# Supplementary material for: BMP signaling regulates the dorsal planarian midline and is needed for asymmetric regeneration
Source: Oxford University Press journal article supplement (doi:10.1242/dev.007138), 2007-10-18
Supplement: dev007138figs1.pdf [file dev007138figs1.pdf]

SMEDOLLOID-1 G.g. Colloid D.m. Tolloid MELMLRKF... 50 43 38

SMEDOLLOID-1 G.g. Colloid D.m. Tolloid FRFLDPCKA... 99 90 81

SMEDOLLOID-1 G.g. Colloid D.m. Tolloid NHYS... 149 128 115

SMEDOLLOID-1 G.g. Colloid D.m. Tolloid EMRF... 199 172 155

SMEDOLLOID-1 G.g. Colloid D.m. Tolloid TIKM... 248 219 204

SMEDOLLOID-1 G.g. Colloid D.m. Tolloid QASIG... 298 269 254

SMEDOLLOID-1 G.g. Colloid D.m. Tolloid FNF... 346 319 304

SMEDOLLOID-1 G.g. Colloid D.m. Tolloid PPI... 392 363 354

SMEDOLLOID-1 G.g. Colloid D.m. Tolloid SFE... 424 395 404

SMEDOLLOID-1 G.g. Colloid D.m. Tolloid LDCT... 474 445 454

SMEDOLLOID-1 G.g. Colloid D.m. Tolloid RNT... 522 493 504

SMEDOLLOID-1 G.g. Colloid D.m. Tolloid YS... 572 543 554

SMEDOLLOID-1 G.g. Colloid D.m. Tolloid INN... 622 593 604

SMEDOLLOID-1 G.g. Colloid D.m. Tolloid CACD... 670 641 654

SMEDOLLOID-1 G.g. Colloid D.m. Tolloid RII... 716 686 704

SMEDOLLOID-1 G.g. Colloid D.m. Tolloid YCG... 766 736 754

SMEDOLLOID-1 G.g. Colloid D.m. Tolloid EHF... 815 783 801

SMEDOLLOID-1 G.g. Colloid D.m. Tolloid NYP... 865 833 851

SMEDOLLOID-1 G.g. Colloid D.m. Tolloid SIK... 915 883 901

SMEDOLLOID-1 G.g. Colloid D.m. Tolloid GKL... 964 932 950

SMEDOLLOID-1 G.g. Colloid D.m. Tolloid YEP... 1014 982 1000

SMEDOLLOID-1 G.g. Colloid D.m. Tolloid DDI... 1063 1008 1050

SMEDOLLOID-1 G.g. Colloid D.m. Tolloid FIEHA... 1068 1008 1057
