# Supplementary material for: BMP signaling regulates the dorsal planarian midline and is needed for asymmetric regeneration
Source: Oxford University Press journal article supplement (doi:10.1242/dev.007138), 2007-10-18
Supplement: dev007138figs2.pdf [file dev007138figs2.pdf]

SMEDSMAD4-1 M L M S L N D P S P V N **SNDACM S I V N S L L C H R Q G G E S Q N F S R K A I E S L V K K L K E K R E E L D F L I T** 60  
H.s.SMAD4 - M D N M S I T N T P T **SNDAC L S I V H S L M C H R Q G G E S E T F A K R A I E S L V K K L K E K K D E L D S L I T** 59

SMEDSMAD4-1 **A V T T S G T Q P T G C V T I P K T L D G R L Q I A G R K C F P H V I Y S R I W R W P N L H K N E L R Q N K C C I Y G Y** 120  
H.s.SMAD4 **A I T T N G A H P S K C V T I Q R T L D G R L Q V A G R K G F P H V I Y A R L W R W P D L H K N E L K H V K Y C Q Y A F** 119

SMEDSMAD4-1 E M **K L D Y V C I N P Y H Y D R V V P S A V D I S E L S L T S S I E D L D D T E S P S V M D S E S V N E T L K Y I S N S** 180  
H.s.SMAD4 D L **K C D S V C V N P Y H Y E R V V S P G I D L S G L T L Q S N A P S S M M V K D E Y V H D F E - - - - -** 167

SMEDSMAD4-1 S N G **P D D S L H M R A R M T L Q Y G S S N A E Y S L D D P D P L K S R I G Q S L D V Q S M S D S S G S P S D Q F K P R** 240  
H.s.SMAD4 - G Q **P S L S T E G H S I Q T I Q H P - - - - - P - - - S N R A S T E T Y S T P A L L A P S E S N - - - -** 207

SMEDSMAD4-1 I G Q D G D **N I P T T I K Y E N S V V A H Y C Q N S P S N G N F K I A S L T G R G G S Q N - S Q G S S A S Q Q Q N Q T Q** 299  
H.s.SMAD4 - A T S T A N **F P N I P V A S T S Q P A S I L G G S H S E G L L Q I A S G P Q P G Q Q N G F T G Q P A T Y H H N S T T** 266

SMEDSMAD4-1 R N **T N Q P T Q S T P Q Q S R P N F N T S S S S W N Q N Q G F D R P P T T S A Q P L Q A L T H Q R P - - - - - P E Y** 352  
H.s.SMAD4 T W **T G S R T A P Y T - - - P N L P H H Q N G H L Q H H P P M P P H P G H Y W P V H N E L A F Q P P I S N H P A P E Y** 322

SMEDSMAD4-1 **W C T I A Y F E L N Q Q V G E L F K V P S Q Y S C V T V D G Y T D P S S P N R F C L G Q L S N V H R S E S S E K S R L Y** 412  
H.s.SMAD4 **W C S I A Y F E M D V Q V G E T F K V P S S C P I V T V D G Y V D P S G G D R F C L G Q L S N V H R T E A I E R A R L H** 382

SMEDSMAD4-1 **I G K G V E L N N V G E G D V W I R C L S A H S V F V Q S Y Y L D R E A G R A P G D A V H K I Y P G A Y I K V F D I R Q** 472  
H.s.SMAD4 **I G K G V Q L E C K G E G D V W V R C L S D H A V F V Q S Y Y L D R E A G R A P G D A V H K I Y P S A Y I K V F D L R Q** 442

SMEDSMAD4-1 **C H Q Q M K K A S T E A Q L A W V R Q A A V V A G S S N S I T S S V A N Q G S N S L N N L S A A G I G V D D L S P F C V** 532  
H.s.SMAD4 **C H R Q M Q Q Q A A T A Q A A A A Q A A A V A G N I P G P G S V G G I A P A I S L S - - A A A G I G V D D L R R L C I** 500

SMEDSMAD4-1 **L R L S F V K G W G P D Y P R H N I K E T P C W I E I K L N R P L Q L L D E V L Q S M S V N E Y K P T R H F F A N Y Y N** 592  
H.s.SMAD4 **L R M S F V K G W G P D Y P R Q S I K E T P C W I E I H L H R A L Q L L D E V L H T M P I A D P Q P L D - - - - -** 552

SMEDSMAD4-1 Q S Q S G L G P S G P L H P N 607  
H.s.SMAD4 - - - - - 552
