# Supplementary material for: BMP signaling regulates the dorsal planarian midline and is needed for asymmetric regeneration
Source: Oxford University Press journal article supplement (doi:10.1242/dev.007138), 2007-10-18
Supplement: dev007138figs3.pdf [file dev007138figs3.pdf]

SMEDBMP4-1 M Q K L I V V N I Q I L C C F I F K L T Q I I D A K D S F Y G K R F G S Q N N N P S E K V R S N L Q K M L L S N M G L Q 60  
M.m. BMP4 M I P G N R M L M V V L L C Q V L L G G A S H A S L I P E T G K K K V A E I Q G H A G G R R S G Q S H E L L R D F E A T 60

SMEDBMP4-1 P D D V V D S E K Y A E L S E K L P H F V P D F M K S L Y - V K S - - - R Y N L F N F S V N I E G K - - P V H L G - P I 113  
M.m. BMP4 L L Q M F G L R R R P Q P S K S - - A V I P D Y M R D L Y R L Q S G E E E E E E Q S Q G T G L E Y P E R P A S R A N T V 118

SMEDBMP4-1 E I I H - C Q R L R N I Q T W S S V G I H K L V F K - S S V Y T N D N H P L A R E L R L N R R L F P K I L Q E P P N N K 171  
M.m. BMP4 R S F H H E E H L E N I P G T S E S S A F R F L F N L S S I P E N E V I S S A - E L R L F R - - - E Q V D Q G P D W E Q 174

SMEDBMP4-1 S N E M H V I M M I F N E H F Q L I K E K P I N - - S K S F M K H G - - - - W I S V D I S - E Y V K S S V F Y I K M Y G 224  
M.m. BMP4 G F H R I N I Y E V M K P P A E M V P G H L I T R L L D T R L V H H N V T R W E T F D V S P A V L R W T R E K Q P N Y G 234

SMEDBMP4-1 F W R N R S S H T S T D L K F L I Q K M N Q L Y L Y Y A N I V T F Y G N K A P L P T Y N Q E E S T I P K D E N I R L K R 284  
M.m. BMP4 L - A I E V T H L H Q T R T H Q G Q - H V R I S R S L P Q G S G D W A Q L R P L L V T F G H D G R G H T L T R R R A K R 292

SMEDBMP4-1 V K R D K T D Y I Q S L E D D C Q R Y S L I V T F K E V G W S K W I I A P Q N Y N A Y Y C K G N C P Y P L S D N F N A T 344  
M.m. BMP4 S P K H H P Q R S R K K N K N C R R H S L Y V D F S D V G W N D W I V A P P G Y Q A F Y C H G D C P F P L A D H L N S T 352

SMEDBMP4-1 N H A I I Q L L I H G L K D L S I P K P C C V P Y N L R P E T L L Y L N R E G D A L L R E F K D M S V S S C S C H 401  
M.m. BMP4 N H A I V Q T L V N S V N S - S I P K A C C V P T E L S A I S M L Y L D E Y D K V V L K N Y Q E M V V E G C G S R 408
