# Supplementary figures and images for: BMP signaling regulates the dorsal planarian midline and is needed for asymmetric regeneration
Source: Oxford University Press journal article supplement (doi:10.1242/dev.007138), 2007-10-18

**A**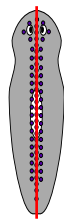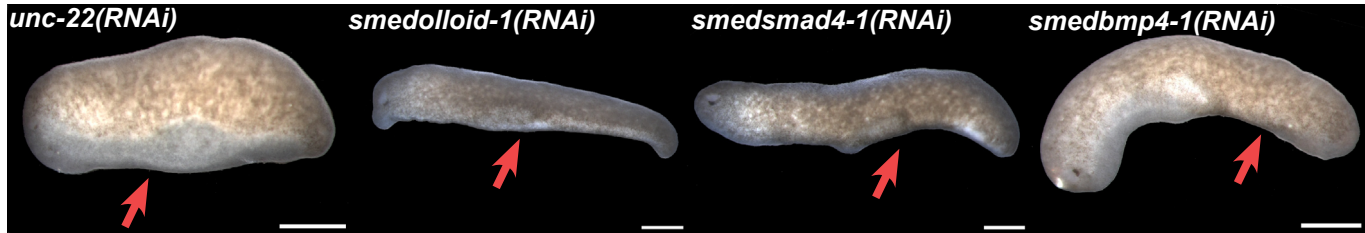**B**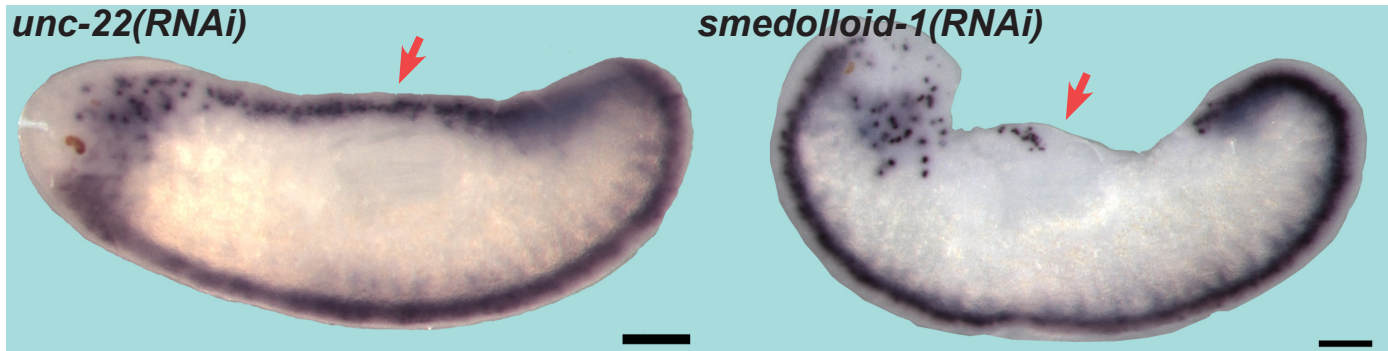

Supplement: dev007138figs4.pdf [file dev007138figs4.pdf]
